# Supplementary material for: Low-cost exercise interventions improve long-term cardiometabolic health independently of a family history of type 2 diabetes: a randomized parallel group trial
Source: PubMed Central journal article supplement (PMC7682194; doi:10.1136/bmjdrc-2020-001377), 2020-11-20
Supplement: bmjdrc-2020-001377supp001.pdf [file bmjdrc-2020-001377supp001.pdf]

## Online-Only Supplemental Material

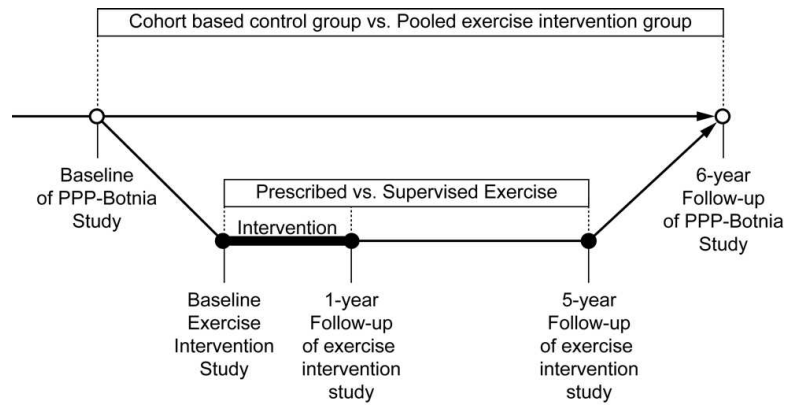

Supplemental Figure S1. The flow of the study

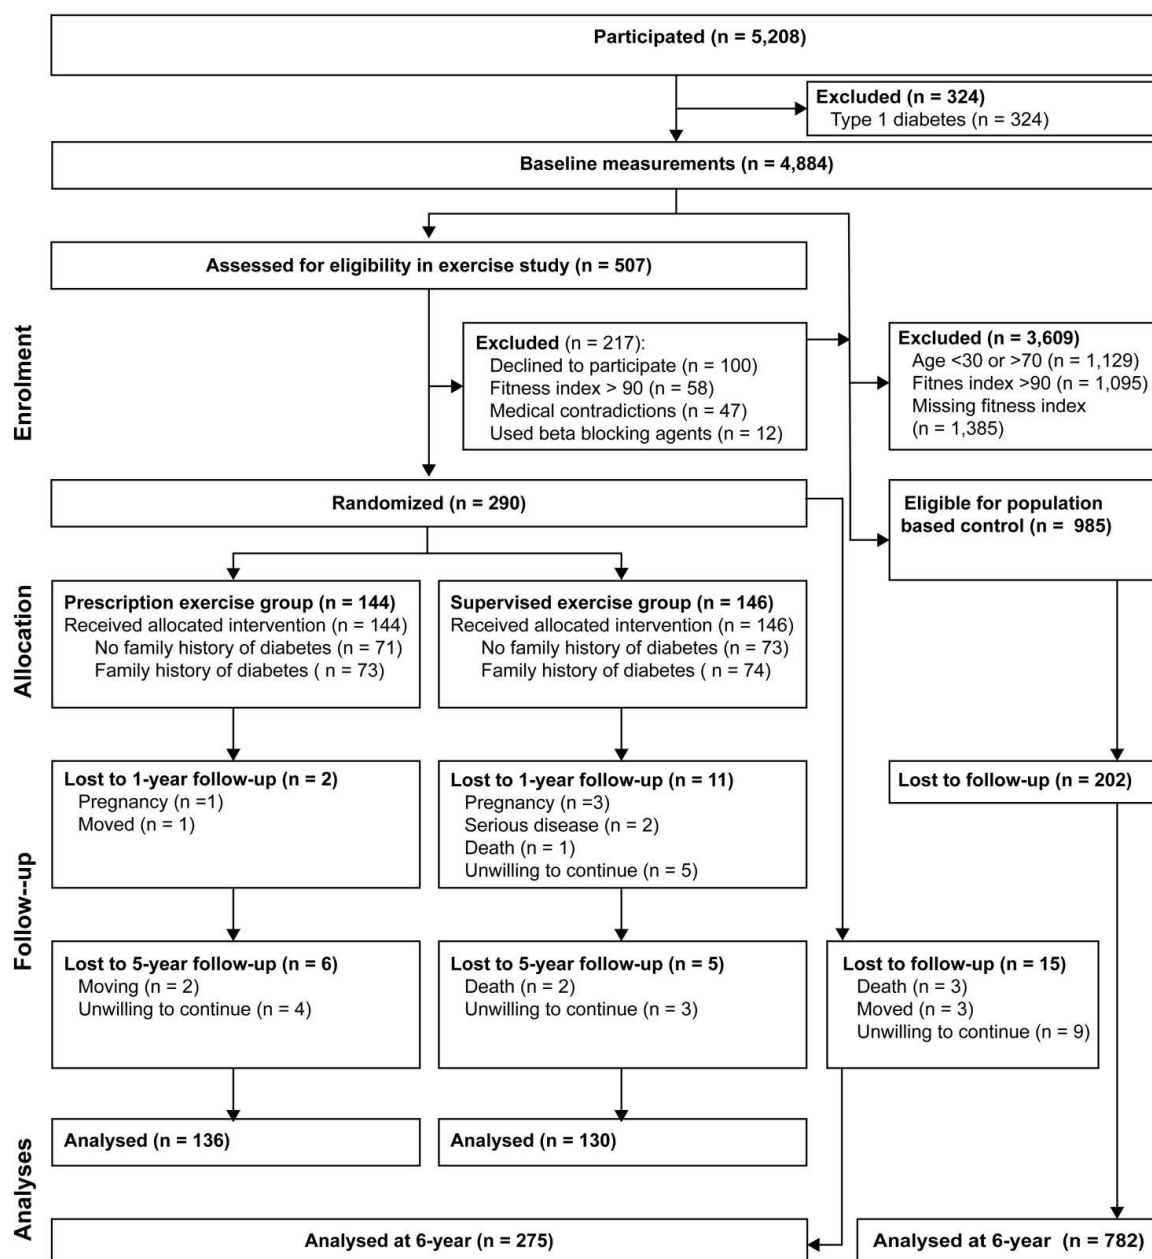

Supplemental Figure S2. Flow chart of participants.

Supplemental Table S1. Physical dose of the 12-month supervised exercise intervention

| Variable                              | Median (IQR) |
|---------------------------------------|--------------|
| Number of sessions (n/12 months)      |              |
| Nordic walking                        | 4 (18)       |
| Resistance training                   | 30 (38)      |
| Aquatic training                      | 0 (10)       |
| Total                                 | 46 (58)      |
| Duration (min/12 months)              |              |
| Nordic walking                        | 240 (1080)   |
| Resistance training                   | 1800 (2280)  |
| Aquatic training                      | 0 (600)      |
| Total                                 | 2760 (3480)  |
| Intensity (MET)                       |              |
| Time-weighted average intensity (MET) | 4 (0.5)      |
| Volume (MET-hours/12 months)          |              |
| Nordic walking                        | 19.2 (86.4)  |
| Resistance training                   | 105 (133)    |
| Aquatic training                      | 0 (55)       |
| Total                                 | 182.3 (235)  |

MET = Metabolic equivalent of task, IQR = interquartile range

Supplemental Table S2. Comparison of volume of physical activity between prescription and exercise group during a 1-year intervention.

| Variable                                   | Prescription group (PG),<br>n=142 | Exercise group (EG),<br>n=135 | Between group comparison |        |
|--------------------------------------------|-----------------------------------|-------------------------------|--------------------------|--------|
|                                            | Mean (SD)                         | Mean (SD)                     | Mean difference (95% CI) | P      |
| Aerobic exercises (METH/wk)                | 13.2 (10.6)                       | 13.9 (9.8)                    | 0.8 (-1.7 – 3.1)         | 0.54   |
| Resistance exercises (METH/wk)             | 0.9 (2.2)                         | 3.6 (2.9)                     | 2.6 (-2.0 – 3.2)         | <0.001 |
| Miscellaneous physical activity (METH/wk)* | 8.1 (16.5)                        | 9.6 (18.7)                    | 1.5 (-2.5 – 5.8)         | 0.49   |
| Total physical activity (METH/wk)          | 22.2 (19.6)                       | 27.1 (22.0)                   | 4.9 (-0.3 – 9.7)         | 0.057  |

\*includes e.g. home activities, home repair, lawn and gardening, self-care

Supplemental Table S3. The effect of 1-year supervised exercise intervention on physical activity, muscle strength, and insulin and glucose metabolism at 1-year and 5-years.

| Variable               | n   | Mean (SE)    |              |               | Exercise vs Prescription group change,<br>Mean (95% CI) |                     | P for time x group interaction |
|------------------------|-----|--------------|--------------|---------------|---------------------------------------------------------|---------------------|--------------------------------|
|                        |     | Baseline     | 1-year       | 5-years       | 1-year                                                  | 5-years             |                                |
| PA (METh/wk)           |     |              |              |               |                                                         |                     |                                |
| Prescription           | 135 | 20.9 (1.8)   | 23.8 (23.8)  | 19.9 (1.5)    |                                                         |                     |                                |
| Exercise               | 127 | 25.6 (1.9)   | 29.7 (29.7)  | 25.6 (1.9)    | 1.3 (-4.4 – 7.0)                                        | 1.1 (-4.7 – 6.8)    | 0.883                          |
| PA (min/wk)            |     |              |              |               |                                                         |                     |                                |
| Prescription           | 135 | 199.4 (17.5) | 226.6 (20.7) | 189.7 (14.6)  |                                                         |                     |                                |
| Exercise               | 127 | 243.4 (18.0) | 282.6 (21.4) | 244.2 ((17.8) | 12.1 (-42.3 – 66.6)                                     | 10.3 (-44.3 – 64.9) | 0.883                          |
| 1000 Steps/d           |     |              |              |               |                                                         |                     |                                |
| Prescription           | 114 | 6.5 (0.2)    | 7.3 (7.3)    | 6.4 (0.2)     |                                                         |                     |                                |
| Exercise               | 99  | 6.5 (0.3)    | 7.7 (7.7)    | 6.8 (0.3)     | 0.4 (-0.3 – 1.1)                                        | 0.4 (-0.4 – 1.1)    | 0.488                          |
| Arm push (kg)          |     |              |              |               |                                                         |                     |                                |
| Prescription           | 24  | 27.0 (2.2)   | 27.0 (27.0)  | 28.9 (2.5)    |                                                         |                     |                                |
| Exercise               | 86  | 27.1 (1.5)   | 33.4 (33.4)  | 31.7 (1.8)    | 6.3 (4.0 – 8.5)                                         | 2.6 (0.3 – 4.9)     | <0.001                         |
| Arm pull (kg)          |     |              |              |               |                                                         |                     |                                |
| Prescription           | 22  | 44.8 (3.1)   | 45.2 (45.2)  | 50.8 (3.9)    |                                                         |                     |                                |
| Exercise               | 86  | 44.0 (1.6)   | 52.9 (52.9)  | 54.4 (1.9)    | 8.6 (5.3 – 11.9)                                        | 4.3 (-1.2 – 9.9)    | <0.001                         |
| Biceps curl (kg)       |     |              |              |               |                                                         |                     |                                |
| Prescription           | 15  | 13.5 (1.5)   | 14.2 (14.2)  | 14.3 (1.6)    |                                                         |                     |                                |
| Exercise               | 43  | 16.0 (2.1)   | 22.6 (22.6)  | 20.6 (3.0)    | 5.8 (3.1 – 8.4)                                         | 3.1 (0.5 – 5.7)     | <0.001                         |
| Triceps extension (kg) |     |              |              |               |                                                         |                     |                                |
| Prescription           | 14  | 18.5 (1.3)   | 19.9 (19.9)  | 21.5 (1.9)    |                                                         |                     |                                |
| Exercise               | 42  | 23.1 (2.9)   | 33.2 (33.2)  | 31.2 (3.7)    | 9.1 (6.0 – 12.1)                                        | 5.4 (2.0 – 8.7)     | <0.001                         |
| Leg extension (kg)     |     |              |              |               |                                                         |                     |                                |
| Prescription           | 22  | 21.2 (1.6)   | 24.2 (24.2)  | 24.2 (2.1)    |                                                         |                     |                                |
| Exercise               | 87  | 24.6 (1.6)   | 31.5 (31.5)  | 30.4 (1.8)    | 4.0 (1.6 – 6.4)                                         | 2.7 (0.6 – 4.9)     | 0.002                          |
| Leg curl (kg)          |     |              |              |               |                                                         |                     |                                |
| Prescription           | 24  | 24.6 (1.5)   | 26 (26)      | 26.9 (1.6)    |                                                         |                     |                                |
| Exercise               | 88  | 27.9 (1.3)   | 35 (35)      | 34.6 (1.8)    | 5.8 (3.8 – 7.7)                                         | 4.4 (2.5 – 6.3)     | <0.001                         |

|                                |     |              |               |              |                       |                     |       |
|--------------------------------|-----|--------------|---------------|--------------|-----------------------|---------------------|-------|
| AUC glucose                    |     |              |               |              |                       |                     |       |
| Prescription                   | 130 | 816.0 (11.6) | 805.1 (805.1) | 836.3 (13.5) |                       |                     |       |
| Exercise                       | 123 | 817.5 (11.6) | 796.7 (796.7) | 859.4 (14.6) | -9.8 (-37.9 – 18.2)   | 21.7 (-8.9 – 52.3)  | 0.109 |
| AUC insulin (10 <sup>3</sup> ) |     |              |               |              |                       |                     |       |
| Prescription                   | 121 | 5.43 (0.27)  | 5.10 (0.26)   | 5.86 (0.34)  |                       |                     |       |
| Exercise                       | 115 | 5.60 (0.27)  | 4.93 (0.24)   | 6.20 (0.32)  | -0.34 (-0.93 – 0.25)  | 0.16 (-0.54 – 0.86) | 0.338 |
| ISI                            |     |              |               |              |                       |                     |       |
| Prescription                   | 120 | 149.7 (6.8)  | 168.3 (7.7)   | 146.5 (8.5)  |                       |                     |       |
| Exercise                       | 114 | 144.6 (7.9)  | 165.8 (8.1)   | 131.9 (8.1)  | 2.5 (-13.5 – 0.02)    | -9.4 (-27.6 – 0.01) | 0.430 |
| CIR                            |     |              |               |              |                       |                     |       |
| Prescription                   | 124 | 210.5 (20.2) | 215.8 (16.9)  | 196.8 (29.9) |                       |                     |       |
| Exercise                       | 119 | 240.3 (26.9) | 212.1 (17.1)  | 204.2 (14.6) | -33.5 (-83.6 – 16.7)  | -22.2 (-104.9 –     | 0.417 |
| DI (10 <sup>3</sup> )          |     |              |               |              |                       |                     |       |
| Prescription                   | 120 | 29.67 (2.99) | 34.51 (3.42)  | 23.20 (6.41) |                       |                     |       |
| Exercise                       | 114 | 28.37 (2.81) | 31.91 (3.45)  | 24.51 (2.17) | -1.31 (-10.18 – 7.57) | 2.68 (-11.63 – 17)  | 0.883 |

---

Models adjusted for family history of type 2 diabetes

Supplemental Table S4. Baseline characteristics between the pooled intervention group and the population-based control group

| Baseline characteristics | Control group | Pooled intervention group |
|--------------------------|---------------|---------------------------|
|                          | Mean (SE)     | Mean (SE)                 |
| Female, n(%)             | 324 (41)      | 130 (47)                  |
| FH+, n(%)                | 296 (38)      | 140 (51)                  |
| Age*                     | 50.8 (0.4)    | 49.8 (0.7)                |
| Fitness index*           | 71.6 (0.6)    | 70.8 (1.2)                |
| LTPA (MET-hours/wk)*     | 22.4 (1.2)    | 23.0 (1.7)                |
| Follow-up time*          | 6.8 (0.02)    | 6.8 (0.1)                 |

\*Propensity score weighted estimated means

FH+ = family history of diabetes, LTPA = leisure-time PA

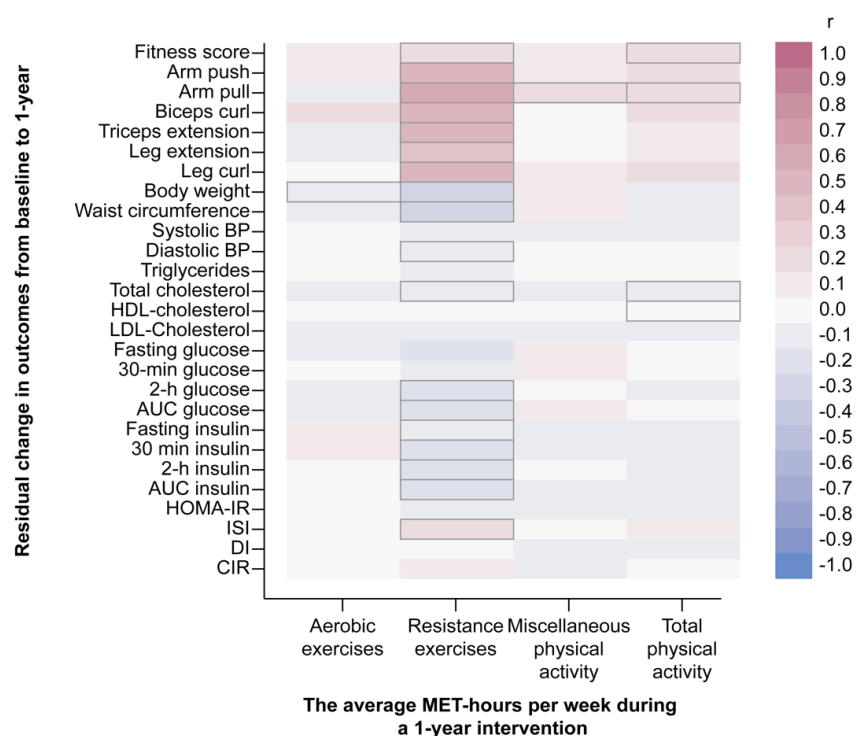

Supplemental Figure S3. Correlation between the residual change in outcomes from baseline to 1-year and the volume of physical exercise performed during the intervention. BP = blood pressure, HDL = high-density lipoprotein, LDL = low-density lipoprotein, AUC = area under the curve, HOMA = homeostatic model assessment for insulin resistance, ISI = insulin sensitivity index, DI = disposition index, CIR = corrected insulin response, MET = metabolic equivalent of task. Grey squares indicate the nominal statistical significance ( $p < 0.05$ ).



Supplemental Table S5. The effect of prescribed and supervised exercise interventions on body weight, waist circumference, blood pressure, lipid and glucose metabolism compared to the control group.

| Variable                                  | Mean (SE)*  |             | Between the group difference in change from baseline to 6-years** |                    | P-value |
|-------------------------------------------|-------------|-------------|-------------------------------------------------------------------|--------------------|---------|
|                                           | Baseline    | 6-years     | Mean (95% CI)                                                     |                    |         |
| <b>PA (METh/wk)</b>                       |             |             |                                                                   |                    |         |
| Control                                   | 22.3 (1.2)  |             |                                                                   |                    |         |
| Prescription                              | 24.2 (2.4)  |             |                                                                   |                    |         |
| Exercise                                  | 22.1 (2.5)  |             |                                                                   |                    |         |
| Prescription vs control†                  |             |             | 1.9                                                               | (-3.4 – 7.2)       | 0.489   |
| Exercise vs control†                      |             |             | -0.2                                                              | (-5.7 – 5.2)       | 0.929   |
| Exercise vs prescription†                 |             |             | -2.1                                                              | (-8.8 – 4.6)       | 0.534   |
| <b>Weight (kg)</b>                        |             |             |                                                                   |                    |         |
| Control                                   | 82.0 (0.5)  | 83.2 (0.5)  |                                                                   |                    |         |
| Prescription                              | 82.2 (1.4)  | 82.6 (1.3)  |                                                                   |                    |         |
| Exercise                                  | 82.5 (1.2)  | 83.5 (1.3)  |                                                                   |                    |         |
| Prescription vs control                   |             |             |                                                                   | -0.8 (-2.1 – 0.5)  | 0.218   |
| Exercise vs control                       |             |             |                                                                   | -0.2 (-1.2 – 0.8)  | 0.712   |
| Exercise vs prescription                  |             |             |                                                                   | 0.6 (-0.8 – 2.1)   | 0.406   |
| <b>Waist circumference (cm)</b>           |             |             |                                                                   |                    |         |
| Control                                   | 93.9 (0.4)  | 96.1 (0.4)  |                                                                   |                    |         |
| Prescription                              | 94.5 (1.1)  | 95.5 (1.0)  |                                                                   |                    |         |
| Exercise                                  | 94.9 (0.9)  | 96.8 (1.0)  |                                                                   |                    |         |
| Prescription vs control                   |             |             |                                                                   | -1.1 (-2.4 – 0.1)  | 0.072   |
| Exercise vs control                       |             |             |                                                                   | -0.2 (-1.2 – 0.9)  | 0.746   |
| Exercise vs prescription                  |             |             |                                                                   | 1.0 (-0.5 – 2.4)   | 0.184   |
| <b>Body mass index (kg/m<sup>2</sup>)</b> |             |             |                                                                   |                    |         |
| Control                                   | 28.0 (0.1)  | 28.4 (0.2)  |                                                                   |                    |         |
| Prescription                              | 28.0 (0.4)  | 28.2 (0.3)  |                                                                   |                    |         |
| Exercise                                  | 28.0 (0.3)  | 28.3 (0.4)  |                                                                   |                    |         |
| Prescription vs control                   |             |             |                                                                   | -0.2 (-0.7 – 0.2)  | 0.318   |
| Exercise vs control                       |             |             |                                                                   | -0.1 (-0.4 – 0.2)  | 0.626   |
| Exercise vs prescription                  |             |             |                                                                   | 0.1 (-0.3 – 0.6)   | 0.565   |
| <b>Systolic BP (mmHg)</b>                 |             |             |                                                                   |                    |         |
| Control                                   | 134.8 (0.7) | 139.7 (0.7) |                                                                   |                    |         |
| Prescription                              | 134.8 (1.4) | 135.9 (1.4) |                                                                   |                    |         |
| Exercise                                  | 132.1 (1.3) | 131.8 (1.4) |                                                                   |                    |         |
| Prescription vs control                   |             |             |                                                                   | -3.7 (-6 – -1.4)   | 0.002   |
| Exercise vs control                       |             |             |                                                                   | -6.0 (-8.4 – -3.5) | <0.001  |
| Exercise vs prescription                  |             |             |                                                                   | -2.3 (-5.2 – 0.7)  | 0.135   |
| <b>Diastolic BP (mmHg)</b>                |             |             |                                                                   |                    |         |
| Control                                   | 84.0 (0.4)  | 79.8 (0.4)  |                                                                   |                    |         |
| Prescription                              | 82.3 (0.9)  | 76.2 (0.8)  |                                                                   |                    |         |
| Exercise                                  | 80.4 (0.7)  | 74.4 (0.8)  |                                                                   |                    |         |
| Prescription vs control                   |             |             |                                                                   | -2.6 (-3.9 – -1.2) | <0.001  |
| Exercise vs control                       |             |             |                                                                   | -3.3 (-4.7 – -1.9) | <0.001  |
| Exercise vs prescription                  |             |             |                                                                   | -0.7 (-2.4 – 1)    | 0.392   |

|                            |              |              |                     |       |
|----------------------------|--------------|--------------|---------------------|-------|
| Triglycerides (mmol/L)     |              |              |                     |       |
| Control                    | 1.5 (0.03)   | 1.5 (0.03)   |                     |       |
| Prescription               | 1.4 (0.1)    | 1.3 (0.1)    |                     |       |
| Exercise                   | 1.4 (0.1)    | 1.4 (0.1)    |                     |       |
| Prescription vs control    |              |              | -0.1 (-0.2 – 0.01)  | 0.061 |
| Exercise vs control        |              |              | -0.03 (-0.1 – 0.1)  | 0.556 |
| Exercise vs prescription   |              |              | 0.1 (-0.1 – 0.2)    | 0.292 |
| Total cholesterol (mmol/L) |              |              |                     |       |
| Control                    | 5.5 (0.04)   | 5.5 (0.04)   |                     |       |
| Prescription               | 5.6 (0.1)    | 5.7 (0.1)    |                     |       |
| Exercise                   | 5.5 (0.1)    | 5.5 (0.1)    |                     |       |
| Prescription vs control    |              |              | 0.2 (0.1 – 0.4)     | 0.008 |
| Exercise vs control        |              |              | 0.03 (-0.1 – 0.2)   | 0.661 |
| Exercise vs prescription   |              |              | -0.2 (-0.4 – 0.02)  | 0.079 |
| HDL cholesterol (mmol/L)   |              |              |                     |       |
| Control                    | 1.3 (0.01)   | 1.3 (0.01)   |                     |       |
| Prescription               | 1.4 (0.03)   | 1.4 (0.04)   |                     |       |
| Exercise                   | 1.3 (0.03)   | 1.3 (0.04)   |                     |       |
| Prescription vs control    |              |              | 0.1 (0.03 – 0.1)    | 0.003 |
| Exercise vs control        |              |              | 0.05 (-0.003 – 0.1) | 0.064 |
| Exercise vs prescription   |              |              | -0.04 (-0.1 – 0.04) | 0.333 |
| LDL cholesterol (mmol/L)   |              |              |                     |       |
| Control                    | 3.5 (0.03)   | 3.5 (0.04)   |                     |       |
| Prescription               | 3.6 (0.1)    | 3.7 (0.1)    |                     |       |
| Exercise                   | 3.6 (0.1)    | 3.5 (0.1)    |                     |       |
| Prescription vs control    |              |              | 0.2 (0.03 – 0.3)    | 0.015 |
| Exercise vs control        |              |              | 0.01 (-0.1 – 0.2)   | 0.889 |
| Exercise vs prescription   |              |              | -0.2 (-0.3 – 0.02)  | 0.079 |
| Fasting glucose (mmol/L)   |              |              |                     |       |
| Control                    | 5.4 (0.02)   | 5.5 (0.03)   |                     |       |
| Prescription               | 5.2 (0.05)   | 5.5 (0.05)   |                     |       |
| Exercise                   | 5.3 (0.1)    | 5.6 (0.1)    |                     |       |
| Prescription vs control    |              |              | 0.2 (0.1 – 0.3)     | 0.001 |
| Exercise vs control        |              |              | 0.2 (0.1 – 0.3)     | 0.003 |
| Exercise vs prescription   |              |              | 0.002 (-0.1 – 0.1)  | 0.976 |
| 30-min glucose (mmol/L)    |              |              |                     |       |
| Control                    | 8.5 (0.1)    | 8.9 (0.1)    |                     |       |
| Prescription               | 8.4 (0.1)    | 8.6 (0.1)    |                     |       |
| Exercise                   | 8.5 (0.2)    | 8.8 (0.2)    |                     |       |
| Prescription vs control    |              |              | -0.3 (-0.5 – -0.02) | 0.037 |
| Exercise vs control        |              |              | -0.1 (-0.4 – 0.2)   | 0.372 |
| Exercise vs prescription   |              |              | 0.1 (-0.2 – 0.5)    | 0.436 |
| 2-h glucose (mmol/L)       |              |              |                     |       |
| Control                    | 5.3 (0.1)    | 5.9 (0.1)    |                     |       |
| Prescription               | 5.3 (0.1)    | 5.5 (0.1)    |                     |       |
| Exercise                   | 5.2 (0.1)    | 5.6 (0.2)    |                     |       |
| Prescription vs control    |              |              | -0.3 (-0.6 – -0.04) | 0.025 |
| Exercise vs control        |              |              | -0.2 (-0.5 – 0.2)   | 0.265 |
| Exercise vs prescription   |              |              | 0.1 (-0.3 – 0.5)    | 0.511 |
| AUC glucose                |              |              |                     |       |
| Control                    | 890.7 (4.96) | 937.9 (7.0)  |                     |       |
| Prescription               | 877.7 (12.4) | 903.6 (13.1) |                     |       |
| Exercise                   | 884.3 (12.3) | 921.3 (16.2) |                     |       |
| Interventions              | 881.0 (8.7)  | 912.5 (10.5) |                     |       |

|                          |              |              |                       |        |
|--------------------------|--------------|--------------|-----------------------|--------|
| Precsription vs control  |              |              | -25.5 (-50.0 – -1.0)  | 0.041  |
| Exercise vs control      |              |              | -12.7 (-39.6 – 14.3)  | 0.355  |
| Exercise vs prescription |              |              | 12.8 (-19.6 – 45.1)   | 0.438  |
| Fasting insulin (mmol/L) |              |              |                       |        |
| Control                  | 7.7 (0.2)    | 9.2 (0.2)    |                       |        |
| Prescription             | 6.6 (0.3)    | 7.4 (0.4)    |                       |        |
| Exercise                 | 9.1 (1.2)    | 8.3 (0.5)    |                       |        |
| Precsription vs control  |              |              | -1.6 (-2.4 – -0.8)    | <0.001 |
| Exercise vs control      |              |              | -1.6 (-2.7 – -0.5)    | 0.005  |
| Exercise vs prescription |              |              | 0.03 (-1.1 – 1.2)     | 0.957  |
| 30-min insulin (mmol/L)  |              |              |                       |        |
| Control                  | 63.6 (1.5)   | 76.5 (2.0)   |                       |        |
| Prescription             | 68.8 (3.1)   | 69.6 (3.9)   |                       |        |
| Exercise                 | 72.8 (4.0)   | 77.4 (5.0)   |                       |        |
| Precsription vs control  |              |              | -11.9 (-19.1 – -4.6)  | 0.001  |
| Exercise vs control      |              |              | -7.4 (-15.8 – 1.0)    | 0.082  |
| Exercise vs prescription |              |              | 4.4 (-5.7 – 14.5)     | 0.390  |
| 2-h insulin (mmol/L)     |              |              |                       |        |
| Control                  | 37.2 (1.4)   | 47.9 (2.1)   |                       |        |
| Prescription             | 35.8 (2.7)   | 37.1 (2.8)   |                       |        |
| Exercise                 | 32.6 (2.7)   | 38.7 (2.9)   |                       |        |
| Precsription vs control  |              |              | -10.6 (-16.7 – -4.4)  | 0.001  |
| Exercise vs control      |              |              | -6.2 (-12.9 – 0.5)    | 0.070  |
| Exercise vs prescription |              |              | 4.4 (-3.5 – 12.2)     | 0.275  |
| AUC insulin              |              |              |                       |        |
| Control                  | 5.7 (0.13)   | 6.96 (0.19)  |                       |        |
| Prescription             | 5.9 (0.27)   | 6.04 (0.33)  |                       |        |
| Exercise                 | 6.0 (0.3)    | 6.42 (0.35)  |                       |        |
| Interventions            | 6.0 (0.2)    | 6.23 (0.24)  |                       |        |
| Precsription vs control  |              |              | -1.2 (-1.83 – -0.57)  | <0.001 |
| Exercise vs control      |              |              | -0.88 (-1.51 – -0.26) | 0.006  |
| Exercise vs prescription |              |              | 0.32 (-0.46 – 1.09)   | 0.427  |
| ISI                      |              |              |                       |        |
| Control                  | 25.2 (1.16)  | 23.44 (1.12) |                       |        |
| Prescription             | 33.4 (4.63)  | 22.91 (5.65) |                       |        |
| Exercise                 | 29.5 (2.98)  | 26.27 (2.47) |                       |        |
| Interventions            | 31.5 (2.78)  | 24.56 (3.13) |                       |        |
| Precsription vs control  |              |              | 22.0 (8.5 – 35.5)     | 0.001  |
| Exercise vs control      |              |              | 11.8 (-2.1 – 25.7)    | 0.097  |
| Exercise vs prescription |              |              | -10.3 (-28.4 – 7.9)   | 0.268  |
| CIR                      |              |              |                       |        |
| Control                  | 142.4 (3.31) | 120.3 (3.0)  |                       |        |
| Prescription             | 140.2 (5.5)  | 139.8 (7.6)  |                       |        |
| Exercise                 | 138.0 (8.5)  | 128.9 (7.5)  |                       |        |
| Interventions            | 139.1 (5.0)  | 134.5 (5.4)  |                       |        |
| Precsription vs control  |              |              | -25.6 (-81.4 – 30.2)  | 0.369  |
| Exercise vs control      |              |              | -7.3 (-42.5 – 27.9)   | 0.683  |
| Exercise vs prescription |              |              | 18.3 (-46.4 – 83.0)   | 0.580  |
| DI                       |              |              |                       |        |
| Control                  | 198.2 (8.01) | 208.9 (6.9)  |                       |        |
| Prescription             | 241.0 (26.1) | 196.7 (27.4) |                       |        |
| Exercise                 | 242.5 (20.9) | 219.0 (18.8) |                       |        |
| Interventions            | 241.8 (16.8) | 207.7 (16.7) |                       |        |
| Precsription vs control  |              |              | -2.11 (-13.07 – 8.86) | 0.706  |

|                          |            |           |                      |       |
|--------------------------|------------|-----------|----------------------|-------|
| Exercise vs control      |            |           | 1.77 (-3.09 – 6.64)  | 0.474 |
| Exercise vs prescription |            |           | 3.88 (-7.71 – 15.47) | 0.511 |
| HOMA-IR                  |            |           |                      |       |
| Control                  | 1.8 (0.05) | 2.3 (0.1) |                      |       |
| Prescription             | 1.5 (0.1)  | 1.8 (0.1) |                      |       |
| Exercise                 | 2.2 (0.3)  | 2.1 (0.1) |                      |       |
| Prescription vs control  |            |           | -0.4 (-0.6 – -0.1)   | 0.003 |
| Exercise vs control      |            |           | -0.4 (-0.7 – -0.03)  | 0.031 |
| Exercise vs prescription |            |           | 0.01 (-0.3 – 0.3)    | 0.96  |

\*Propensity score weighted estimated means, \*\*Adjusted for baseline value and family history of

diabetes, †Comparison of between group difference at baseline only (propensity score weighted

estimated means and adjusted for family history of diabetes)

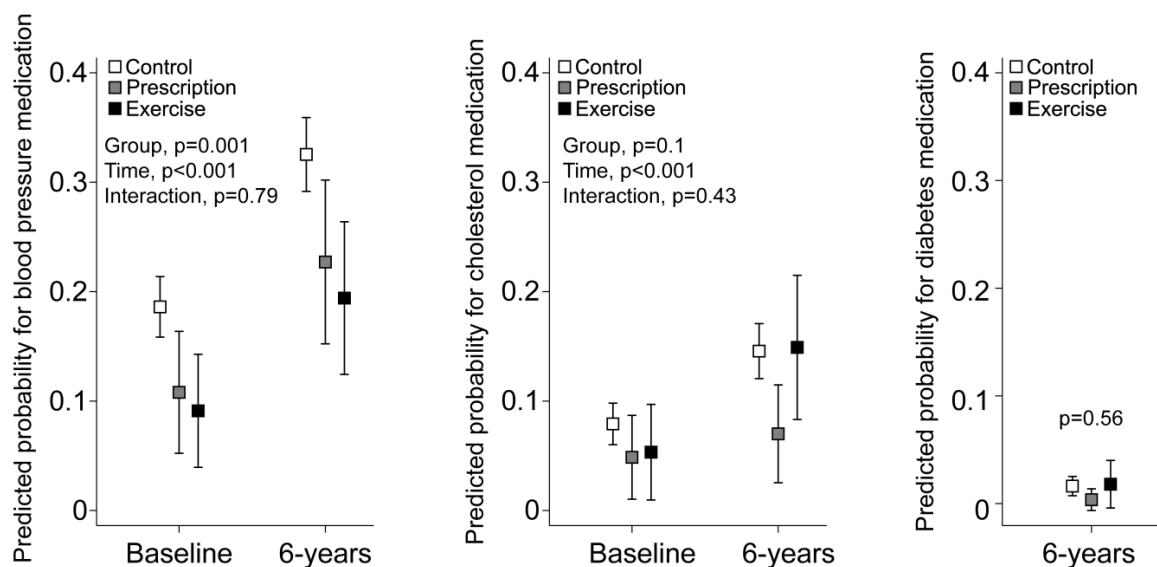

Supplemental Figure S4. Comparison of usage of blood pressure, cholesterol and diabetes medication between the control group, the prescription group and the supervised exercise group from baseline to 6-year follow-up. For usage of diabetes medication was compared only at 6-years as none of the participants used diabetes medication at baseline. The error bars indicate the 95% confidence intervals.

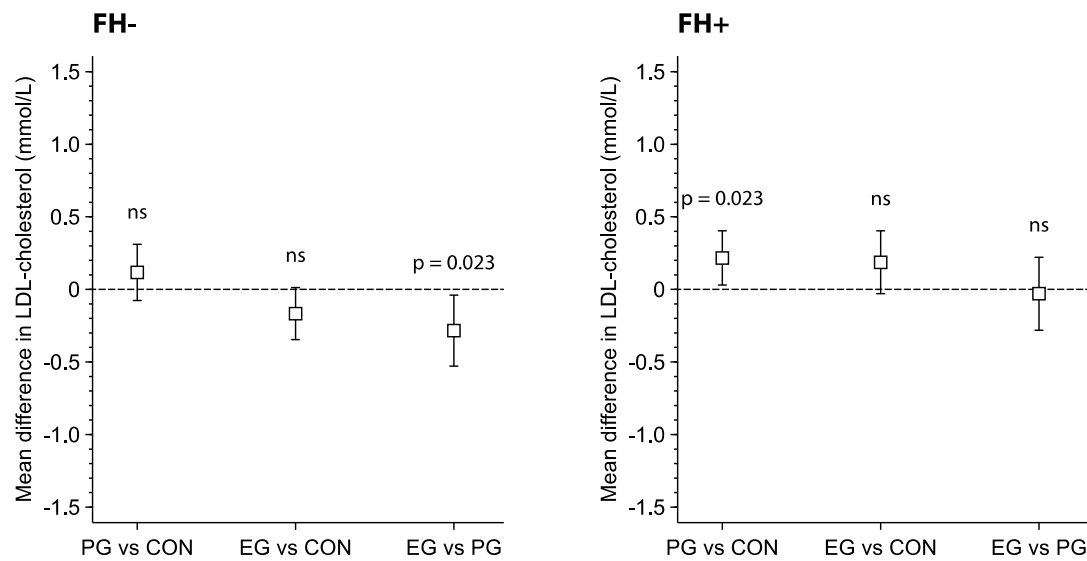

Supplemental Figure S5. The influence of FH on exercise response on low-density lipoprotein (LDL) cholesterol during the 6-year follow-up. PG = prescription group, EG = Supervised exercise intervention group, CON = matched control group from the same population study, FH = family history. Error bars indicate 95% CI.

Supplemental Table S6. Sensitivity analyses of main outcomes of the effect of supervised exercise intervention compared to the prescription group in participant with data for particular variable from at least one time point (baseline, 1-year or 5- years) in respect to the analyses including participants with data on each timepoint.

| Variable                   | Participants who had data at least from one timepoint |                                         |                    |                         | Participants who had data on each timepoint |                                         |                    |                         | Percentage difference in sample sizes |
|----------------------------|-------------------------------------------------------|-----------------------------------------|--------------------|-------------------------|---------------------------------------------|-----------------------------------------|--------------------|-------------------------|---------------------------------------|
|                            | n                                                     | Mean between group difference (95% CI)* | P for time x group | P for time x group x FH | n                                           | Mean between group difference (95% CI)* | P for time x group | P for time x group x FH |                                       |
| Fitness index              |                                                       |                                         |                    |                         |                                             |                                         |                    |                         |                                       |
| 1 year vs baseline         | 290                                                   | 2.9 (0.4 – 5.3)                         | 0.008              | 0.434                   | 193                                         | 1.7 (-1.1 – 4.5)                        | 0.074              | 0.118                   | 33.4                                  |
| 5 year vs baseline         |                                                       | -1.2 (-4.3 – 2)                         |                    |                         |                                             | -1.6 (-5 – 1.8)                         |                    |                         |                                       |
| Weight (kg)                |                                                       |                                         |                    |                         |                                             |                                         |                    |                         |                                       |
| 1 year vs baseline         | 290                                                   | -1 (-1.7 – -0.2)                        | 0.005              | 0.125                   | 261                                         | -0.9 (-1.7 – -0.2)                      | 0.008              | 0.141                   | 10.0                                  |
| 5 year vs baseline         |                                                       | 0.4 (-0.7 – 1.5)                        |                    |                         |                                             | 0.4 (-0.7 – 1.5)                        |                    |                         |                                       |
| Waist circumference (cm)   |                                                       |                                         |                    |                         |                                             |                                         |                    |                         |                                       |
| 1 year vs baseline         | 290                                                   | -1.3 (-2.4 – -0.2)                      | 0.007              | 0.046                   | 261                                         | -1.3 (-2.4 – -0.1)                      | 0.011              | 0.047                   | 10.0                                  |
| 5 year vs baseline         |                                                       | 0.5 (-0.9 – 1.8)                        |                    |                         |                                             | 0.5 (-0.9 – 1.8)                        |                    |                         |                                       |
| Systolic BP (mmHg)         |                                                       |                                         |                    |                         |                                             |                                         |                    |                         |                                       |
| 1 year vs baseline         | 290                                                   | -2.1 (-4.6 – -0.5)                      | 0.217              | 0.383                   | 258                                         | -2.1 (-4.7 – -0.5)                      | 0.244              | 0.388                   | 11.0                                  |
| 5 year vs baseline         |                                                       | -1.9 (-5 – 1.1)                         |                    |                         |                                             | -1.9 (-4.9 – 1.2)                       |                    |                         |                                       |
| Diastolic BP (mmHg)        |                                                       |                                         |                    |                         |                                             |                                         |                    |                         |                                       |
| 1 year vs baseline         | 290                                                   | -1.3 (-2.9 – -0.2)                      | 0.056              | 0.787                   | 258                                         | -1.6 (-3.2 – 0)                         | 0.019              | 0.977                   | 11.0                                  |
| 5 year vs baseline         |                                                       | -2.1 (-3.9 – -0.3)                      |                    |                         |                                             | -2.5 (-4.3 – -0.6)                      |                    |                         |                                       |
| Triglycerides (mmol/L)     |                                                       |                                         |                    |                         |                                             |                                         |                    |                         |                                       |
| 1 year vs baseline         | 290                                                   | -0.14 (-0.29 – -0.01)                   | 0.177              | 0.561                   | 264                                         | -0.2 (-0.3 – -0.01)                     | 0.147              | 0.608                   | 9.0                                   |
| 5 year vs baseline         |                                                       | -0.02 (-0.2 – 0.1)                      |                    |                         |                                             | 0.01 (-0.1 – 0.1)                       |                    |                         |                                       |
| Total cholesterol (mmol/L) |                                                       |                                         |                    |                         |                                             |                                         |                    |                         |                                       |

|                          |     |                     |       |       |     |                     |       |       |      |
|--------------------------|-----|---------------------|-------|-------|-----|---------------------|-------|-------|------|
| 1 year vs baseline       | 290 | -0.2 (-0.4 – -0.03) | 0.001 | 0.031 | 264 | -0.2 (-0.4 – -0.01) | 0.006 | 0.024 | 9.0  |
| 5 year vs baseline       |     | -0.4 (-0.6 – -0.2)  |       |       |     | -0.3 (-0.5 – -0.1)  |       |       |      |
| HDL cholesterol (mmol/L) |     |                     |       |       |     |                     |       |       |      |
| 1 year vs baseline       | 290 | -0.01 (-0.1 – 0.1)  | 0.226 | 0.214 | 264 | 0.01 (-0.1 – 0.1)   | 0.21  | 0.175 | 9.0  |
| 5 year vs baseline       |     | -0.1 (-0.1 – 0)     |       |       |     | -0.1 (-0.1 – 0.01)  |       |       |      |
| LDL cholesterol (mmol/L) |     |                     |       |       |     |                     |       |       |      |
| 1 year vs baseline       | 290 | -0.2 (-0.3 – 0.01)  | 0.001 | 0.009 | 253 | -0.2 (-0.3 – 0.004) | 0.006 | 0.008 | 12.8 |
| 5 year vs baseline       |     | -0.3 (-0.5 – -0.1)  |       |       |     | -0.3 (-0.5 – -0.1)  |       |       |      |
| Fasting glucose (mmol/L) |     |                     |       |       |     |                     |       |       |      |
| 1 year vs baseline       | 290 | 0 (-0.1 – 0.1)      | 0.888 | 0.604 | 264 | 0 (-0.1 – 0.1)      | 0.831 | 0.551 | 9.0  |
| 5 year vs baseline       |     | 0 (-0.1 – 0.2)      |       |       |     | 0.04 (-0.1 – 0.2)   |       |       |      |
| 30-min glucose (mmol/L)  |     |                     |       |       |     |                     |       |       |      |
| 1 year vs baseline       | 290 | 0.1 (-0.2 – 0.4)    | 0.463 | 0.224 | 254 | 0.03 (-0.3 – 0.4)   | 0.307 | 0.236 | 12.4 |
| 5 year vs baseline       |     | 0.2 (-0.1 – 0.6)    |       |       |     | 0.3 (-0.1 – 0.6)    |       |       |      |
| 2-hour glucose (mmol/L)  |     |                     |       |       |     |                     |       |       |      |
| 1 year vs baseline       | 290 | -0.2 (-0.5 – 0.2)   | 0.253 | 0.944 | 257 | -0.2 (-0.6 – 0.1)   | 0.123 | 0.932 | 11.4 |
| 5 year vs baseline       |     | 0.2 (-0.2 – 0.5)    |       |       |     | 0.1 (-0.3 – 0.5)    |       |       |      |
| Fasting insulin (mU/L)   |     |                     |       |       |     |                     |       |       |      |
| 1 year vs baseline       | 286 | 0.4 (-0.8 – 1.5)    | 0.23  | 0.537 | 256 | 0.4 (-0.7 – 1.6)    | 0.231 | 0.665 | 10.5 |
| 5 year vs baseline       |     | 1 (-0.2 – 2.2)      |       |       |     | 1 (-0.2 – 2.3)      |       |       |      |
| 30-min insulin (mU/L)    |     |                     |       |       |     |                     |       |       |      |
| 1 year vs baseline       | 286 | -3.8 (-11.1 – 3.4)  | 0.335 | 0.757 | 245 | -5.8 (-13.4 – 1.8)  | 0.202 | 0.945 | 14.3 |
| 5 year vs baseline       |     | 3.5 (-5.9 – 12.8)   |       |       |     | 2.6 (-7.1 – 12.4)   |       |       |      |
| 2-hour insulin (mU/L)    |     |                     |       |       |     |                     |       |       |      |
| 1 year vs baseline       | 285 | -1.8 (-7 – 3.4)     | 0.378 | 0.249 | 241 | -1.6 (-6.9 – 3.7)   | 0.562 | 0.41  | 15.4 |
| 5 year vs baseline       |     | 2.5 (-3.5 – 8.4)    |       |       |     | 1.8 (-4.1 – 7.6)    |       |       |      |
| HOMA-IR                  |     |                     |       |       |     |                     |       |       |      |
| 1 year vs baseline       | 283 | 0.1 (-0.2 – 0.4)    | 0.245 | 0.622 | 248 | 0.1 (-0.2 – 0.5)    | 0.349 | 0.799 | 12.4 |
| 5 year vs baseline       |     | 0.3 (-0.1 – 0.6)    |       |       |     | 0.3 (-0.1 – 0.6)    |       |       |      |



All analyses are based on the similar linear mixed model.

\* The mean difference describes how much the supervised exercise group deviates from the prescription group.
